# Supplementary material for: 2bRAD reveals fine-scale genetic structuring among populations within the Mediterranean zoanthid Parazoanthus axinellae (Schmidt, 1862)
Source: Springer Nature journal article supplement (doi:10.1007/s00338-023-02456-7), 2024-02-21
Supplement: MOESM2 [file 338_2023_2456_MOESM2_ESM.pdf]

# Supplementary Tables

**Table S1.** Read summary statistics. Number of sequences before (column: ‘Number of raw reads’) and after (column: ‘Number of filtered 2bRAD tags’) quality filtering for each sample. Excluded samples included (1) low coverage individuals, (2) samples with over 30% of missing loci and (3) individuals which were not considered for SNP calling and R analysis due to a lack of additional replicates within their corresponding population. These excluded samples are indicated with ‘0’ in the column: ‘Retained Individuals’. Summarized information across all samples can be found at the bottom of the table. Table is divided with a bold line between Slender and Stocky individuals.

| Sample ID                       | Number of raw reads | Number of filtered 2bRAD tags | Sample ID (concatenated)        | Number of filtered 2bRAD tags (after concatenation) | Retained Individuals |
|---------------------------------|---------------------|-------------------------------|---------------------------------|-----------------------------------------------------|----------------------|
| T_Pax_ALA_10_CAGAGAC_L005.fasta | 2,346,871           | 1,942,124                     | T_Pax_ALA_10_concatenated.fasta | 1,942,124                                           | 1,942,124            |
| T_Pax_ALA_11_TTGCGGA_L005.fasta | 2,019,483           | 1,336,875                     | T_Pax_ALA_11_concatenated.fasta | 1,336,875                                           | 1,336,875            |
| T_Pax_ALA_12_CCGTGAA_L005.fasta | 1,375,730           | 904,238                       | T_Pax_ALA_12_concatenated.fasta | 904,238                                             | 904,238              |
| T_Pax_ALA_13_AGCTCGT_L005.fasta | 2,117,007           | 1,569,395                     | T_Pax_ALA_13_concatenated.fasta | 1,569,395                                           | 1,569,395            |
| T_Pax_ALA_14_GCTTGTG_L005.fasta | 2,329,648           | 1,954,734                     | T_Pax_ALA_14_concatenated.fasta | 1,954,734                                           | 1,954,734            |
| T_Pax_ALA_15_TTCCTCG_L005.fasta | 1,865,563           | 1,584,392                     | T_Pax_ALA_15_concatenated.fasta | 1,584,392                                           | 1,584,392            |
| T_Pax_ALA_16_GATGCAG_L005.fasta | 2,997,892           | 2,259,411                     | T_Pax_ALA_16_concatenated.fasta | 2,259,411                                           | 2,259,411            |
| T_Pax_ALA_17_AATGGGC_L007.fasta | 25,614              | 20                            | T_Pax_ALA_17_concatenated.fasta | 20                                                  | 0                    |
| T_Pax_ALA_19_CAACGGA_L005.fasta | 2,473,445           | 2,034,841                     | T_Pax_ALA_19_concatenated.fasta | 2,034,841                                           | 2,034,841            |
| T_Pax_ALA_1_ACACTGC_L005.fasta  | 2,391,304           | 2,210,551                     | T_Pax_ALA_1_concatenated.fasta  | 3,269,804                                           | 3,269,804            |
| T_Pax_ALA_1_CTAGCCA_L005.fasta  | 1,134,079           | 1,059,253                     |                                 |                                                     |                      |
| T_Pax_ALA_20_CGTCGAA_L005.fasta | 2,041,063           | 1,636,330                     | T_Pax_ALA_20_concatenated.fasta | 1,636,330                                           | 1,636,330            |
| T_Pax_ALA_21_ACGACGT_L005.fasta | 2,373,630           | 2,070,740                     | T_Pax_ALA_21_concatenated.fasta | 2,070,740                                           | 2,070,740            |
| T_Pax_ALA_22_GTCACCA_L007.fasta | 109,342             | 16,776                        | T_Pax_ALA_22_concatenated.fasta | 16,776                                              | 0                    |
| T_Pax_ALA_2_GACTGAC_L005.fasta  | 1,483,311           | 1,343,551                     | T_Pax_ALA_2_concatenated.fasta  | 1,343,551                                           | 1,343,551            |
| T_Pax_ALA_3_ACTCGGA_L005.fasta  | 1,131,774           | 1,020,503                     | T_Pax_ALA_3_concat              | 2,639,480                                           | 2,639,480            |

|                                    |           |           |                    |           |           |
|------------------------------------|-----------|-----------|--------------------|-----------|-----------|
| 5.fasta                            |           |           |                    |           |           |
| T_Pax_ALA_3_bis_TTCGGAG_L007.fasta | 822,013   | 736,414   | enated.fasta       |           |           |
| T_Pax_ALA_3_TTCGGAG_L005.fasta     | 959,865   | 882,563   |                    |           |           |
| T_Pax_ALA_4_CTGCATC_L005.fasta     | 1,130,160 | 902,155   | T_Pax_ALA_4_concat | 2,162,938 | 2,162,938 |
| T_Pax_ALA_4_TCCCACA_L005.fasta     | 1,412,409 | 1,260,783 | enated.fasta       |           |           |
| T_Pax_ALA_5_CAGTCGT_L005.fasta     | 1,338,263 | 1,135,166 | T_Pax_ALA_5_concat | 1,135,166 | 1,135,166 |
| T_Pax_ALA_6_CCCATTG_L005.fasta     | 1,766,513 | 1,519,391 | enated.fasta       |           |           |
| T_Pax_ALA_6_CTCCTGA_L005.fasta     | 737,957   | 648,490   | T_Pax_ALA_6_concat | 2,167,881 | 2,167,881 |
| T_Pax_ALA_7_GGTTTCG_L005.fasta     | 5,648,509 | 4,811,674 | enated.fasta       |           |           |
| T_Pax_ALA_8_CGTTTCAG_L005.fasta    | 1,214,715 | 805,448   | T_Pax_ALA_8_concat | 805,448   | 805,448   |
| T_Pax_ALA_9_TAGTGGC_L005.fasta     | 1,947,492 | 1,589,539 | enated.fasta       |           |           |
| T_Pax_CAMP_10_CGACAAC_L005.fasta   | 1,955,984 | 1,704,828 | T_Pax_CAMP_10_co   | 1,704,828 | 1,704,828 |
| T_Pax_CAMP_11_CCAATCC_L005.fasta   | 2,263,444 | 1,541,888 | ncatenated.fasta   |           |           |
| T_Pax_CAMP_1_TACGGGT_L005.fasta    | 2,593,852 | 2,314,714 | T_Pax_CAMP_11_co   | 1,541,888 | 1,541,888 |
| T_Pax_CAMP_2_TGGCCAT_L005.fasta    | 1,416,126 | 1,252,648 | ncatenated.fasta   |           |           |
| T_Pax_CAMP_3_ATGGAGG_L005.fasta    | 1,979,401 | 1,819,480 | T_Pax_CAMP_1_con   | 2,314,714 | 2,314,714 |
| T_Pax_CAMP_4_CTACGAG_L005.fasta    | 1,715,633 | 1,547,270 | catenated.fasta    |           |           |
| T_Pax_CAMP_5_CCAGAGT_L005.fasta    | 2,157,367 | 1,725,683 | T_Pax_CAMP_2_con   | 1,252,648 | 1,252,648 |
| T_Pax_CAMP_6_GTGTCTG_L005.fasta    | 2,257,527 | 1,859,229 | catenated.fasta    |           |           |
| T_Pax_CAMP_7_ATGTGCG_L005.fasta    | 1,780,577 | 1,295,542 | T_Pax_CAMP_3_con   | 1,819,480 | 1,819,480 |
| T_Pax_CAMP_8_GGGATTC_L005.fasta    | 1,953,188 | 1,662,418 | catenated.fasta    |           |           |
| T_Pax_CAMP_9_ACCTAGC_L005.fasta    | 2,009,792 | 1,683,357 | T_Pax_CAMP_4_con   | 1,547,270 | 1,547,270 |
| T_Pax_CAMP_9_TGTCGTC_L005.fasta    | 1,807,453 | 1,227,065 | catenated.fasta    |           |           |
| T_Pax_CUB_10a_S47.fasta            | 6,733,063 | 5,697,715 | T_Pax_CAMP_5_con   | 1,725,683 | 1,725,683 |
| T_Pax_CUB_10c_S56.fasta            | 1,596,920 | 1,423,067 | catenated.fasta    |           |           |
| T_Pax_CUB_1a_S48.fasta             | 787,182   | 663,198   | T_Pax_CAMP_6_con   | 1,859,229 | 1,859,229 |
| T_Pax_CUB_1b_S46.fasta             | 4,500,060 | 55,778    | catenated.fasta    |           |           |
|                                    |           |           | T_Pax_CAMP_7_con   | 1,295,542 | 1,295,542 |
|                                    |           |           | catenated.fasta    |           |           |
|                                    |           |           | T_Pax_CAMP_8_con   | 1,662,418 | 1,662,418 |
|                                    |           |           | catenated.fasta    |           |           |
|                                    |           |           | T_Pax_CAMP_9_con   | 2,910,422 | 2,910,422 |
|                                    |           |           | catenated.fasta    |           |           |
|                                    |           |           | T_Pax_CUB_10a_con  | 5,697,715 | 5,697,715 |
|                                    |           |           | catenated.fasta    |           |           |
|                                    |           |           | T_Pax_CUB_10c_con  | 1,423,067 | 1,423,067 |
|                                    |           |           | catenated.fasta    |           |           |
|                                    |           |           | T_Pax_CUB_1a_conc  | 663,198   | 663,198   |
|                                    |           |           | atenated.fasta     |           |           |
|                                    |           |           | T_Pax_CUB_1b_conc  | 55,778    | 0         |
|                                    |           |           | atenated.fasta     |           |           |

|                                           |           |           |                                     |            |            |
|-------------------------------------------|-----------|-----------|-------------------------------------|------------|------------|
| T_Pax_CUB_2A_S49.fasta                    | 182,297   | 26,641    | T_Pax_CUB_2A_conc<br>atenated.fasta | 26,641     | 0          |
| T_Pax_CUB_2B_S42.fasta                    | 3,330,976 | 1,171,857 | T_Pax_CUB_2B_conc<br>atenated.fasta | 1,171,857  | 0          |
| T_Pax_CUB_3A_S50.fasta                    | 5,501,169 | 4,896,475 | T_Pax_CUB_3A_conc<br>atenated.fasta | 4,896,475  | 4,896,475  |
| T_Pax_CUB_3b_S38.fasta                    | 37,272    | 18,111    | T_Pax_CUB_3b_conc<br>atenated.fasta | 18,111     | 0          |
| T_Pax_CUB_4a_S51.fasta                    | 1,072,978 | 992,506   | T_Pax_CUB_4a_conc<br>atenated.fasta | 992,506    | 992,506    |
| T_Pax_CUB_4b_S31.fasta                    | 103,763   | 63,049    | T_Pax_CUB_4b_conc<br>atenated.fasta | 63,049     | 0          |
| T_Pax_CUB_7a_S55.fasta                    | 1,587,343 | 1,260,420 | T_Pax_CUB_7a_conc<br>atenated.fasta | 1,260,420  | 1,260,420  |
| T_Pax_GIA_15_CGAAGTG_L0<br>05.fasta       | 2,022,399 | 1,758,814 | T_Pax_GIA_15_conc<br>atenated.fasta | 3,415,184  | 3,415,184  |
| T_Pax_GIA_15_GAGCGTA_L0<br>05.fasta       | 1,951,376 | 1,656,370 |                                     |            |            |
| T_Pax_GIA_16_GTCTGGT_L0<br>05.fasta       | 695,071   | 7,363     | T_Pax_GIA_16_conc<br>atenated.fasta | 7,621      | 0          |
| T_Pax_GIA_16_L1bis_GTCTG<br>GT_L001.fasta | 35,064    | 258       |                                     |            |            |
| T_Pax_GIA_18_CAGATCG_L0<br>05.fasta       | 2,207,390 | 1,522,595 | T_Pax_GIA_18_conc<br>atenated.fasta | 1,522,595  | 1,522,595  |
| T_Pax_GIA_19_CTCGTTT_L00<br>5.fasta       | 1,565,711 | 1,244,260 | T_Pax_GIA_19_conc<br>atenated.fasta | 1,244,260  | 1,244,260  |
| T_Pax_GIA_21_ACCGTAG_L0<br>05.fasta       | 2,060,423 | 1,788,331 | T_Pax_GIA_21_conc<br>atenated.fasta | 1,788,331  | 1,788,331  |
| T_Pax_GIA_24_ACCAGTC_L0<br>05.fasta       | 2,395,661 | 1,896,931 | T_Pax_GIA_24_conc<br>atenated.fasta | 1,896,931  | 1,896,931  |
| T_Pax_GIA_25_AAAGCCC_L0<br>05.fasta       | 2,268,640 | 2,052,284 | T_Pax_GIA_25_conc<br>atenated.fasta | 2,052,284  | 2,052,284  |
| T_Pax_GIA_30_ACTCGGA_L0<br>07.fasta       | 1,949,847 | 1,071,742 | T_Pax_GIA_30_conc<br>atenated.fasta | 4,010,046  | 4,010,046  |
| T_Pax_GIA_30_bis_TTGCGGA<br>_L007.fasta   | 5,604,772 | 2,938,304 |                                     |            |            |
| T_Pax_GIA_31_bis_CCGTGAA<br>_L007.fasta   | 3,130,424 | 2,514,943 | T_Pax_GIA_31_conc<br>atenated.fasta | 10,125,557 | 10,125,557 |
| T_Pax_GIA_31_TCCACA_L0<br>07.fasta        | 9,345,347 | 7,610,614 |                                     |            |            |
| T_Pax_GIA_33_CGTACCA_L0<br>05.fasta       | 2,651,068 | 1,873,516 | T_Pax_GIA_33_conc<br>atenated.fasta | 1,873,516  | 1,873,516  |
| T_Pax_GIA_34_bis_TCGCGTT<br>_L007.fasta   | 7,301,432 | 149,319   | T_Pax_GIA_34_conc<br>atenated.fasta | 226,371    | 226,371    |
| T_Pax_GIA_34_TCTGTGG_L0<br>07.fasta       | 1,372,049 | 77,052    |                                     |            |            |
| T_Pax_GIA_36_bis_ACGGGAT<br>_L007.fasta   | 2,472,713 | 53,103    | T_Pax_GIA_36_conc<br>atenated.fasta | 53,103     | 0          |
| T_Pax_GIA_37_bis_GTACTGG<br>_L007.fasta   | 1,729,348 | 26,822    | T_Pax_GIA_37_conc<br>atenated.fasta | 48,884     | 0          |
| T_Pax_GIA_37_TCCTGGA_L0<br>07.fasta       | 1,050,706 | 22,062    |                                     |            |            |
| T_Pax_GIA_5_TAGTGGC_L00                   | 189,757   | 2,364     | T_Pax_GIA_5_concat                  | 2,364      | 0          |

|                                     |           |           |                                     |           |           |
|-------------------------------------|-----------|-----------|-------------------------------------|-----------|-----------|
| 7.fasta                             |           |           | enated.fasta                        |           |           |
| T_Pax_GIA_6_CAGAGAC_L007.fasta      | 174,712   | 4,768     | T_Pax_GIA_6_concatenated_L007.fasta | 4,768     | 0         |
| T_Pax_PTF_11_TACGGGT_L007.fasta     | 1,846,154 | 1,605,303 | T_Pax_PTF_11_concatenated.fasta     | 1,605,303 | 1,605,303 |
| T_Pax_PTF_12_bis_TGGCCAT_L007.fasta | 2,165,766 | 1,728,125 | T_Pax_PTF_12_concatenated.fasta     | 7,184,415 | 7,184,415 |
| T_Pax_PTF_12_TCGAACCC_L007.fasta    | 6,425,419 | 5,456,290 |                                     |           |           |
| T_Pax_PTF_13_bis_ATGGAGG_L007.fasta | 2,216,147 | 1,913,023 | T_Pax_PTF_13_concatenated.fasta     | 1,924,249 | 1,924,249 |
| T_Pax_PTF_13_GGAGTGA_L007.fasta     | 28,655    | 11,226    |                                     |           |           |
| T_Pax_PTF_14_bis_CTACGAG_L007.fasta | 1,684,345 | 1,134,462 | T_Pax_PTF_14_concatenated.fasta     | 3,564,976 | 3,564,976 |
| T_Pax_PTF_14_CGTACCA_L007.fasta     | 2,858,961 | 2,430,514 |                                     |           |           |
| T_Pax_PTF_15_ACACTGC_L007.fasta     | 1,950,381 | 1,346,524 | T_Pax_PTF_15_concatenated.fasta     | 3,128,115 | 3,128,115 |
| T_Pax_PTF_15_bis_CCTGCAA_L007.fasta | 2,194,952 | 1,781,591 |                                     |           |           |
| T_Pax_PTF_16_bis_AGTCCTG_L007.fasta | 2,128,878 | 1,005,638 | T_Pax_PTF_16_concatenated.fasta     | 2,338,987 | 2,338,987 |
| T_Pax_PTF_16_GACTGAC_L007.fasta     | 3,638,944 | 1,333,349 |                                     |           |           |
| T_Pax_PTF_17_CAGATCG_L007.fasta     | 2,590,598 | 1,484,401 | T_Pax_PTF_17_concatenated.fasta     | 1,484,401 | 1,484,401 |
| T_Pax_PTF_18_GGGAGAA_L007.fasta     | 2,191,073 | 1,973,065 | T_Pax_PTF_18_concatenated.fasta     | 1,973,065 | 1,973,065 |
| T_Pax_PTF_1_TGGGCTA_L007.fasta      | 34,729    | 23,564    | T_Pax_PTF_1_concatenated.fasta      | 23,564    | 0         |
| T_Pax_PUG_A1_GGAGGTT_L007.fasta     | 1,549,287 | 472,414   | T_Pax_PUG_A1_concatenated.fasta     | 472,414   | 472,414   |
| T_Pax_PUG_A2_GAGACCT_L007.fasta     | 1,215,300 | 567,402   | T_Pax_PUG_A2_concatenated.fasta     | 567,402   | 567,402   |
| T_Pax_PUG_A4_GCAACTC_L007.fasta     | 4,574,694 | 3,386,260 | T_Pax_PUG_A4_concatenated.fasta     | 3,386,260 | 3,386,260 |
| T_Pax_PUG_C14_CGATTGC_L007.fasta    | 320,575   | 2,242     | T_Pax_PUG_C14_concatenated.fasta    | 2,242     | 0         |
| T_Pax_PUG_C1_CGTGCTT_L005.fasta     | 1,207,460 | 6,240     | T_Pax_PUG_C1_concatenated.fasta     | 6,240     | 0         |
| T_Pax_PUG_C4_AGCAACC_L005.fasta     | 1,185,719 | 9,318     | T_Pax_PUG_C4_concatenated.fasta     | 9,318     | 0         |
| T_Pax_PUG_C5_GCTCCAT_L005.fasta     | 1,891,766 | 12,893    | T_Pax_PUG_C5_concatenated.fasta     | 12,893    | 0         |
| T_Pax_PUG_C8_GCGTAGA_L005.fasta     | 1,349,020 | 14,742    | T_Pax_PUG_C8_concatenated.fasta     | 14,742    | 0         |
| T_Pax_PVEN_11_TGGTTCC_L005.fasta    | 695,743   | 25,273    | T_Pax_PVEN_11_concatenated.fasta    | 25,273    | 0         |
| T_Pax_PVEN_12_CTTTGGG_L007.fasta    | 603,892   | 3,378     | T_Pax_PVEN_12_concatenated.fasta    | 3,378     | 0         |
| T_Pax_PVEN_13_TACACGG_L005.fasta    | 1,327,872 | 190,171   | T_Pax_PVEN_13_concatenated.fasta    | 190,171   | 190,171   |

|                                       |           |           |                                   |           |           |
|---------------------------------------|-----------|-----------|-----------------------------------|-----------|-----------|
| T_Pax_PVEN_14_GTTCACG_L005.fasta      | 3,615,590 | 1,862,411 | T_Pax_PVEN_14_concatenated.fasta  | 1,862,411 | 1,862,411 |
| T_Pax_PVEN_15_S96.fasta               | 1,296,910 | 1,177,448 | T_Pax_PVEN_15_concatenated.fasta  | 1,177,448 | 0         |
| T_Pax_PVEN_16_GGCATAG_L007.fasta      | 159,750   | 8,186     | T_Pax_PVEN_16_concatenated.fasta  | 8,186     | 0         |
| T_Pax_PVEN_1_TCTCGAG_L005.fasta       | 5,586     | 3,889     | T_Pax_PVEN_1_concatenated.fasta   | 3,889     | 0         |
| T_Pax_PVEN_3_ACGGTCA_L005.fasta       | 3,056,352 | 908,298   | T_Pax_PVEN_3_concatenated.fasta   | 916,830   | 916,830   |
| T_Pax_PVEN_3_CAGCACA_L005.fasta       | 30,331    | 8,532     |                                   |           |           |
| T_Pax_PVEN_4_TCAGCCT_L005.fasta       | 711,171   | 6,582     | T_Pax_PVEN_4_concatenated.fasta   | 6,582     | 0         |
| T_Pax_PVEN_5_GTCCGAT_L007.fasta       | 517,352   | 11,159    | T_Pax_PVEN_5_concatenated.fasta   | 11,159    | 0         |
| T_Pax_PVEN_6_AGCCCAA_L005.fasta       | 3,604,827 | 2,354,020 | T_Pax_PVEN_6_concatenated.fasta   | 2,426,460 | 2,426,460 |
| T_Pax_PVEN_6_TGCACAC_L005.fasta       | 214,122   | 72,440    |                                   |           |           |
| T_Pax_PVEN_7_AGTCCCTG_L005.fasta      | 441,110   | 18,681    | T_Pax_PVEN_7_concatenated.fasta   | 18,681    | 0         |
| T_Pax_PVEN_8_GAGGATG_L005.fasta       | 667,840   | 5,246     | T_Pax_PVEN_8_concatenated.fasta   | 23,978    | 0         |
| T_Pax_PVEN_8_L1bis_GAGGATG_L001.fasta | 4,415,813 | 18,732    |                                   |           |           |
| T_Pax_SAR_20_AGAAGGC_L005.fasta       | 414,214   | 254,046   | T_Pax_SAR_20_concatenated.fasta   | 990,614   | 990,614   |
| T_Pax_SAR_20_CGATGCA_L005.fasta       | 1,103,018 | 736,568   |                                   |           |           |
| T_Pax_SAR_21_CGCGAAA_L005.fasta       | 1,208,545 | 914,370   | T_Pax_SAR_21_concatenated.fasta   | 1,414,804 | 1,414,804 |
| T_Pax_SAR_21_GTGGAAC_L005.fasta       | 895,829   | 500,434   |                                   |           |           |
| T_Pax_SAR_23_TCTGTGG_L005.fasta       | 1,185,073 | 950,074   | T_Pax_SAR_23_concatenated.fasta   | 950,074   | 950,074   |
| T_Pax_SAR_24_ACGGGAT_L005.fasta       | 2,385,855 | 2,038,763 | T_Pax_SAR_24_concatenated.fasta   | 2,038,763 | 2,038,763 |
| T_Pax_SAR_25_GTACTGG_L005.fasta       | 3,294,983 | 3,078,794 | T_Pax_SAR_25_concatenated.fasta   | 3,078,794 | 3,078,794 |
| T_Pax_SAR_26_TGGTGAG_L005.fasta       | 2,217,707 | 1,788,832 | T_Pax_SAR_26_concatenated.fasta   | 1,788,832 | 1,788,832 |
| T_Pax_ALAOR_10_ACGGGAT_L001.fasta     | 176,127   | 150,515   | T_Pax_ALAOR_10_concatenated.fasta | 150,515   | 150,515   |
| T_Pax_ALAOR_11_GTACTGG_L001.fasta     | 4,562     | 61        | T_Pax_ALAOR_11_concatenated.fasta | 61        | 0         |
| T_Pax_ALAOR_12_TGGTGAG_L001.fasta     | 219,529   | 186,685   | T_Pax_ALAOR_12_concatenated.fasta | 186,685   | 186,685   |
| T_Pax_ALAOR_14_GTGGAAC_L001.fasta     | 4,646     | 92        | T_Pax_ALAOR_14_concatenated.fasta | 92        | 0         |
| T_Pax_ALAOR_15_GCGTAGA_L001.fasta     | 101,899   | 61,318    | T_Pax_ALAOR_15_concatenated.fasta | 61,318    | 0         |
| T_Pax_ALAOR_16_GGGAGAA                | 83,253    | 54,340    | T_Pax_ALAOR_16_c                  | 54,340    | 0         |

|                                    |           |           |                                    |           |           |
|------------------------------------|-----------|-----------|------------------------------------|-----------|-----------|
| _L001.fasta                        |           |           | onconcatenated.fasta               |           |           |
| T_Pax_ALAOR_5_ACGACGT_L001.fasta   | 492,467   | 414,849   | T_Pax_ALAOR_5_concatenated.fasta   | 414,849   | 414,849   |
| T_Pax_ALAOR_6_CGAAGTG_L001.fasta   | 297,547   | 248,930   | T_Pax_ALAOR_6_concatenated.fasta   | 248,930   | 248,930   |
| T_Pax_ALAOR_7_CAGATCG_L001.fasta   | 166,990   | 1,598     | T_Pax_ALAOR_7_concatenated.fasta   | 1,598     | 0         |
| T_Pax_ALAOR_8_CTCGTTC_L001.fasta   | 269,328   | 213,038   | T_Pax_ALAOR_8_concatenated.fasta   | 213,038   | 213,038   |
| T_Pax_ALAOR_9_TCGCGTT_L001.fasta   | 232,699   | 207,509   | T_Pax_ALAOR_9_concatenated.fasta   | 207,509   | 207,509   |
| T_Pax_GIAOR_32_concatenated.fasta  | 1,986,366 | 1,769,616 | T_Pax_GIAOR_32_concatenated.fasta  | 1,769,616 | 1,769,616 |
| T_Pax_GIAOR_35_concatenated.fasta  | 2,710,527 | 2,263,867 | T_Pax_GIAOR_35_concatenated.fasta  | 2,263,867 | 2,263,867 |
| T_Pax_GIAOR_36_concatenated.fasta  | 8,103,103 | 5,085,369 | T_Pax_GIAOR_36_concatenated.fasta  | 5,085,369 | 5,085,369 |
| T_Pax_GIAOR_38_concatenated.fasta  | 3,103,136 | 2,771,368 | T_Pax_GIAOR_38_concatenated.fasta  | 2,771,368 | 2,771,368 |
| T_Pax_GIAOR_39_concatenated.fasta  | 1,746,265 | 1,288,523 | T_Pax_GIAOR_39_concatenated.fasta  | 1,288,523 | 1,288,523 |
| T_Pax_GIAOR_40_concatenated.fasta  | 2,462,102 | 2,178,109 | T_Pax_GIAOR_40_concatenated.fasta  | 2,178,109 | 2,178,109 |
| T_Pax_PVENOR_10_TCGAAC_L001.fasta  | 308,024   | 274,760   | T_Pax_PVENOR_10_concatenated.fasta | 274,760   | 274,760   |
| T_Pax_PVENOR_11_GGAGTGA_L001.fasta | 149,708   | 1,351     | T_Pax_PVENOR_11_concatenated.fasta | 1,351     | 0         |
| T_Pax_PVENOR_12_CGTACCA_L001.fasta | 157,859   | 509       | T_Pax_PVENOR_12_concatenated.fasta | 509       | 0         |
| T_Pax_PVENOR_13_TACGGGT_L001.fasta | 243,318   | 211,388   | T_Pax_PVENOR_13_concatenated.fasta | 211,388   | 211,388   |
| T_Pax_PVENOR_14_TGGCCAT_L001.fasta | 337,722   | 283,858   | T_Pax_PVENOR_14_concatenated.fasta | 283,858   | 283,858   |
| T_Pax_PVENOR_15_ATGGAGG_L001.fasta | 299,345   | 250,069   | T_Pax_PVENOR_15_concatenated.fasta | 250,069   | 250,069   |
| T_Pax_PVENOR_16_CTACGAG_L001.fasta | 328,380   | 270,374   | T_Pax_PVENOR_16_concatenated.fasta | 270,374   | 270,374   |
| T_Pax_PVENOR_17_ACACTGC_L001.fasta | 323,368   | 255,090   | T_Pax_PVENOR_17_concatenated.fasta | 255,090   | 255,090   |
| T_Pax_PVENOR_18_GACTGAC_L001.fasta | 169,710   | 143,274   | T_Pax_PVENOR_18_concatenated.fasta | 143,274   | 143,274   |
| T_Pax_PVENOR_19_ACTCGGA_L001.fasta | 331,476   | 282,607   | T_Pax_PVENOR_19_concatenated.fasta | 282,607   | 282,607   |
| T_Pax_PVENOR_1_GCTCCAT_L001.fasta  | 1,337,857 | 1,180,019 | T_Pax_PVENOR_1_concatenated.fasta  | 1,180,019 | 1,180,019 |
| T_Pax_PVENOR_20_TCCCACA_L001.fasta | 180,009   | 107,291   | T_Pax_PVENOR_20_concatenated.fasta | 107,291   | 107,291   |
| T_Pax_PVENOR_2_TCCTGGA_L001.fasta  | 1,771,297 | 1,602,053 | T_Pax_PVENOR_2_concatenated.fasta  | 1,602,053 | 1,602,053 |
| T_Pax_PVENOR_3_CAGCACAL001.fasta   | 2,014,360 | 1,791,374 | T_Pax_PVENOR_3_concatenated.fasta  | 1,791,374 | 1,791,374 |
| T_Pax_PVENOR_5_AGCTCGT_L001.fasta  | 1,214,286 | 1,068,485 | T_Pax_PVENOR_5_concatenated.fasta  | 1,068,485 | 1,068,485 |

|                                   |             |           |                                   |             |             |
|-----------------------------------|-------------|-----------|-----------------------------------|-------------|-------------|
| T_Pax_PVENOR_6_GCTTGTG_L001.fasta | 1,384,866   | 1,203,862 | T_Pax_PVENOR_6_concatenated.fasta | 1,203,862   | 1,203,862   |
| T_Pax_PVENOR_7_GTTACG_L001.fasta  | 867,589     | 2,967     | T_Pax_PVENOR_7_concatenated.fasta | 2,967       | 0           |
| T_Pax_PVENOR_8_CGATGCA_L001.fasta | 576,192     | 9,985     | T_Pax_PVENOR_8_concatenated.fasta | 9,985       | 0           |
| T_Pax_PVENOR_9_GGCTATC_L001.fasta | 335,329     | 1,607     | T_Pax_PVENOR_9_concatenated.fasta | 1,607       | 0           |
| T_Pax_SAROR_16_concatenated.fasta | 665,132     | 230,140   | T_Pax_SAROR_16_concatenated.fasta | 230,140     | 230,140     |
| T_Pax_SAROR_17_concatenated.fasta | 2,513,006   | 2,398,323 | T_Pax_SAROR_17_concatenated.fasta | 2,398,323   | 2,398,323   |
| T_Pax_SAROR_18_concatenated.fasta | 993,991     | 890,035   | T_Pax_SAROR_18_concatenated.fasta | 890,035     | 890,035     |
| T_Pax_SAROR_19_concatenated.fasta | 1,792,278   | 1,353,237 | T_Pax_SAROR_19_concatenated.fasta | 1,353,237   | 1,353,237   |
| T_Pax_SAROR_1_concatenated.fasta  | 1,896,100   | 1,797,027 | T_Pax_SAROR_1_concatenated.fasta  | 1,797,027   | 1,797,027   |
| T_Pax_SAROR_2_concatenated.fasta  | 1,568,708   | 1,480,054 | T_Pax_SAROR_2_concatenated.fasta  | 1,480,054   | 1,480,054   |
| T_Pax_SAROR_3_concatenated.fasta  | 4,294,098   | 4,060,932 | T_Pax_SAROR_3_concatenated.fasta  | 4,060,932   | 4,060,932   |
| <b>TOTAL</b>                      | 274,223,791 |           |                                   | 184,091,482 | 183,758,244 |
| <b>AVERAGE</b>                    | 1,724,678   |           |                                   | 1,157,808   | 1,155,712   |
| <b>SD</b>                         | 1,596,305   |           |                                   | 1,251,355   | 1,253,289   |
| <b>Retained [%]</b>               |             |           |                                   | 67.13       | 67.01       |
| <b>MIN</b>                        | 4,562       |           |                                   | 20          | 77,052      |
| <b>MAX</b>                        | 9,345,347   |           |                                   | 7,610,614   | 7,610,614   |



**Table S2. Outlier loci selection.** The number of outlier loci detected in BayeScan is shown for each of the hierarchical levels: 1) between Slender and Stocky morphotypes ('Y&O' level), and within 2) Slender and 3) Stocky morphotypes.

| Hierarchical levels     | Number of outliers (BayeScan) |
|-------------------------|-------------------------------|
| Between the morphotypes | 469                           |
| Slender                 | 4                             |
| Stocky                  | 23                            |

**Table S3. AMOVA summary statistics.** The 'AMOVA: Overall results' table shows degrees of freedom (Df), sum of squares (Sum Sq) and mean of squares (Mean Sq). The 'AMOVA: Components of covariance' table shows how much variance is detected at each hierarchical level, with sigma ( $\sigma$ ) representing the variance [Sigma ( $\sigma$ ) column]. Most variance is expected to derive from the 'Within Populations' level for groups that are not genetically structured. The 'AMOVA: Phi statistics' table provides the  $\phi$  population differentiation statistics, and a higher  $\phi$  statistic is expected to represent a higher amount of differentiation. The 'AMOVA: Testing significance with 999 Monte-Carlo tests' table shows p values inferred based on 999 permutations at each hierarchical level. AMOVA results are shown as separate tables for each of the hierarchical levels: (1) 'Slender & Stocky', (2) Stocky and (3) Slender.

| <b>Slender &amp; Stocky</b>                                   |                                    |                |                |                |
|---------------------------------------------------------------|------------------------------------|----------------|----------------|----------------|
| <b>AMOVA: Overall results</b>                                 |                                    |                |                |                |
| <b>Test</b>                                                   | <b>Df</b>                          | <b>Sum Sq</b>  | <b>Mean Sq</b> |                |
| Between Morphotypes                                           | 1.00                               | 41,405.77      | 41,405.76      |                |
| Between Populations (nested within Morphotypes)               | 10.00                              | 1,668.03       | 166.80         |                |
| Within Populations                                            | 89.00                              | 4,636.66       | 52.09          |                |
| Total                                                         | 100.00                             | 47,710.45      | 477.10         |                |
| <b>AMOVA: Components of covariance</b>                        |                                    |                |                |                |
| <b>Test</b>                                                   | <b>Sigma (<math>\sigma</math>)</b> |                | <b>%</b>       |                |
| Variations Between Morphotypes                                | 927.39                             |                | 93.32          |                |
| Variations Between Populations (nested within Morphotype)     | 14.29                              |                | 1.44           |                |
| Variations Within Populations                                 | 52.10                              |                | 5.24           |                |
| Total variations                                              | 993.78                             |                | 100.00         |                |
| <b>AMOVA: Phi statistics</b>                                  |                                    |                |                |                |
| <b>Test</b>                                                   | <b>Phi</b>                         |                |                |                |
| Phi-Populations-total                                         | 0.95                               |                |                |                |
| Phi-Populations-Morphotypes                                   | 0.21                               |                |                |                |
| Phi-Morphotypes-total                                         | 0.93                               |                |                |                |
| <b>AMOVA: Testing significance with 999 Monte-Carlo tests</b> |                                    |                |                |                |
| <b>Test</b>                                                   | <b>Obs</b>                         | <b>Std.Obs</b> | <b>Alter</b>   | <b>P value</b> |
| Variations within Populations                                 | 52.097                             | -21.650        | less           | 0.001          |
| Variations between Populations, nested within Morphotype      | 14.289                             | 21.095         | greater        | 0.001          |
| Variations between Morphotypes                                | 927.394                            | 6.632          | greater        | 0.002          |



| Stocky                                                 |             |         |             |                    |          |         |
|--------------------------------------------------------|-------------|---------|-------------|--------------------|----------|---------|
| AMOVA: Overall results                                 |             |         |             |                    |          |         |
| Test                                                   |             |         | Df          | Sum Sq             | Mean Sq  |         |
| Between Populations                                    |             |         | 3           | 5,763.05           | 1,921.02 |         |
| Within Populations                                     |             |         | 29          | 3,074.03           | 106.01   |         |
| Total                                                  |             |         | 32          | 8,837.08           | 276.16   |         |
| AMOVA: Components of covariance                        |             |         |             |                    |          |         |
| Test                                                   |             |         |             | Sigma ( $\sigma$ ) | %        |         |
| Variations Between Populations                         |             |         |             | 232.75             | 68.71    |         |
| Variations Within Populations                          |             |         |             | 106.01             | 31.29    |         |
| Total variations                                       |             |         |             | 338.76             | 100.00   |         |
| AMOVA: Phi statistics                                  |             |         |             |                    |          |         |
| Test                                                   |             |         |             |                    |          | Phi     |
| Phi-Populations-total                                  |             |         |             |                    |          | 0.69    |
| AMOVA: Testing significance with 999 Monte-Carlo tests |             |         |             |                    |          |         |
| Test                                                   | Observation | Std.Obs | Expectation | Variance           | Alter    | P value |
| Variations between Populations                         | 232.75      | 17.76   | 0.97        | 170.27             | greater  | 0.001   |

| Slender                                                |             |         |                    |          |         |         |
|--------------------------------------------------------|-------------|---------|--------------------|----------|---------|---------|
| AMOVA: Overall results                                 |             |         |                    |          |         |         |
| Test                                                   |             | Df      | Sum Sq             | Mean Sq  |         |         |
| Between Populations                                    |             | 7       | 6327.08            | 903.87   |         |         |
| Within Populations                                     |             | 60      | 16714.13           | 278.57   |         |         |
| Total                                                  |             | 67      | 23041.21           | 343.90   |         |         |
| AMOVA: Components of covariance                        |             |         |                    |          |         |         |
| Test                                                   |             |         | Sigma ( $\sigma$ ) | %        |         |         |
| Variations Between Populations                         |             |         | 76.95              | 21.64    |         |         |
| Variations Within Populations                          |             |         | 278.57             | 78.36    |         |         |
| Total variations                                       |             |         | 355.52             | 100.00   |         |         |
| AMOVA: Phi statistics                                  |             |         |                    |          |         |         |
| Test                                                   |             |         |                    |          |         | Phi     |
| Phi-Populations-total                                  |             |         |                    |          |         | 0.22    |
| AMOVA: Testing significance with 999 Monte-Carlo tests |             |         |                    |          |         |         |
| Test                                                   | Observation | Std.Obs | Expectation        | Variance | Alter   | P value |
| Variations between Populations                         | 76.95       | 18.96   | 0.17               | 16.40    | greater | 0.001   |
